# Supplementary material for: Substrate charge transfer drives the adsorption site of metal-phthalocyanines and porphyrins on coinage metal surfaces
Source: Royal Society of Chemistry journal article supplement (doi:10.1039/d5cp01576f), 2025-01-01
Supplement: d5cp01576f2.pdf [file d5cp01576f2.pdf]

Captions to Figures S1 – S17

- Figure S1 Selected internuclear distances (Å) in  $D_{2h}$  H<sub>2</sub>P (upper panel) and H<sub>2</sub>Pz (lower panel) molecules.
- Figure S2 Selected internuclear distances (Å) in  $D_{2h}$  H<sub>2</sub>TPP (upper panel) and H<sub>2</sub>Pc (lower panel) molecules.
- Figure S3 Selected internuclear distances (Å) in  $D_{4h}$  P<sup>2-</sup> (upper panel) and Pz<sup>2-</sup> (lower panel) molecular ions.
- Figure S4 Selected internuclear distances (Å) in  $D_{4h}$  TPP<sup>2-</sup> (upper panel) and Pc<sup>2-</sup> (lower panel) molecular ions.
- Figure S5 Energy position of the GS H<sub>2</sub>P, H<sub>2</sub>TPP, H<sub>2</sub>Pc, and H<sub>2</sub>Pz FMOs compared with the Py and *i*-Ind HOMO energies.
- Figure S6 3D CPs of the Py 1a<sub>2</sub> HOMO (left panel) and the *i*-Ind 2a<sub>2</sub> HOMO (right panel). Displayed isosurfaces correspond to  $\pm 0.02 \text{ e}^{1/2} \times \text{\AA}^{-3/2}$  values. Isolated Py and *i*-Ind have a C<sub>2v</sub> symmetry.
- Figure S7 3D CP of the *i*-IND 1a<sub>2</sub>  $\pi$  MO. Displayed isosurfaces correspond to  $\pm 0.02 \text{ e}^{1/2} \times \text{\AA}^{-3/2}$  values.
- Figure S8 3D CPs of the H<sub>2</sub>P FMOs generated by the 1a<sub>2</sub> Py HOMO. The 3D CP of the 5b<sub>1u</sub> FMO has been also displayed to show the absence of any parenthesis with the Py 1a<sub>2</sub> HOMO. Displayed isosurfaces correspond to  $\pm 0.02 \text{ e}^{1/2} \times \text{\AA}^{-3/2}$  values.
- Figure S9 3D CPs of low-lying H<sub>2</sub>P  $\pi$  MOs. Displayed isosurfaces correspond to  $\pm 0.02 \text{ e}^{1/2} \times \text{\AA}^{-3/2}$  values.
- Figure S10 Qualitative representation of the parenthesis between <sup>pmc</sup> $\pi$  and <sup>pmc</sup> $\pi^*$  FMOs upon the  $D_{2h} \rightarrow D_{4h}$  switching. Energy differences are not in scale while the ordering of the energy levels is that of the H<sub>2</sub>TPP ( $D_{2h}$ ) and TPP<sup>2-</sup> ( $D_{4h}$ )
- Figure S11 3D CPs of one partner of the unoccupied  $D_{4h}$  TPP<sup>2-</sup> 12e<sub>g</sub> and 9b<sub>1u</sub>  $\pi^*$  MOs (upper panel). 3D CPs of one partner of the  $D_{4h}$  Pc<sup>2-</sup> 6e<sub>g</sub> and 3b<sub>1u</sub>  $\pi^*$  MOs (lower panel). Displayed isosurfaces correspond to  $\pm 0.02 \text{ e}^{1/2} \times \text{\AA}^{-3/2}$  values. The 3D CP of the occupied TPP<sup>2-</sup> and Pc<sup>2-</sup> 2a<sub>1u</sub> MO is also reported. The 2a<sub>1u</sub> MO corresponds, both in TPP<sup>2-</sup> and Pc<sup>2-</sup>, to an occupied  $\pi$  orbital, highly localized on the pmc and characterized by four nodal planes passing through N<sup>Py</sup> ( $\sigma_v$ ) and X<sup>m</sup> ( $\sigma_d$ ), X = C in TPP<sup>2-</sup> and X = N in Pc<sup>2-</sup>. The 2a<sub>1u</sub> MO absolute energy value is 0.924 eV and 0.883 eV in TPP<sup>2-</sup> and Pc<sup>2-</sup>, respectively. TPP<sup>2-</sup> and Pc<sup>2-</sup> optimized Cartesian coordinates are those reported in Table S7 and Table S8, respectively.
- Figure S12 Licorice representation of superimposed optimized structures of (a) CoPc and CoPc<sup>+</sup>, (b) NiPc and NiPc<sup>+</sup>, (c) CuPc and CuPc<sup>+</sup>, and (d) ZnPc and ZnPc<sup>+</sup>. BP86 optimized Cartesian coordinates of <sup>2</sup>A<sub>1g</sub> CoPc and <sup>3</sup>A<sub>1u</sub> CoPc<sup>+</sup> are reported in Table S23 and Table S24, respectively; BP86 optimized Cartesian coordinates of <sup>1</sup>A<sub>1g</sub> NiPc and <sup>2</sup>A<sub>1u</sub> NiPc<sup>+</sup> are reported in Table S27 and Table S28, respectively; BP86 optimized Cartesian coordinates of <sup>2</sup>B<sub>1g</sub> CuPc and <sup>3</sup>B<sub>1u</sub> CuPc<sup>+</sup> are reported in Table S30 and Table S31, respectively; BP86 optimized Cartesian coordinates of <sup>1</sup>A<sub>1g</sub> ZnPc and <sup>2</sup>A<sub>1u</sub> ZnPc<sup>+</sup> are reported in Table S33 and Table S34, respectively.
- Figure S13 Schematic representation of the  $\text{}^{\text{S}}\text{CM}_{100}^{\text{nnn}}$  ns AOs SALC of symmetry a, b, and e. Large red and green spheres represent  $\text{}^{\text{S}}\text{CM}$  ns AOs and corresponding different phases.
- Figure S14 Schematic representation of the  $\text{}^{\text{S}}\text{CM}_{100}^{\text{nnn}}$  ns AOs SALC of symmetry a, b, and e. Large red and green spheres represent  $\text{}^{\text{S}}\text{CM}$  ns AOs and corresponding different phases.

- Figure S15 Schematic representation of the  ${}^S\text{CM}_{100}^{nn}$  *ns* AOs SALC of symmetry a and b. Large red and green spheres represent  ${}^S\text{CM}$  *ns* AOs and corresponding different phases.
- Figure S16 Schematic representation of the  ${}^S\text{CM}_{111}^{nnn}$  *ns* AOs SALC of symmetry a, b, and e (1e and 2e). Large red and green spheres represent  ${}^S\text{CM}$  *ns* AOs and corresponding different phases.
- Figure S17 Schematic representation of the  ${}^S\text{CM}_{111}^{nnn}$  *ns* AOs SALC of symmetry a and e. Large red and green spheres represent  ${}^S\text{CM}$  *ns* AOs and corresponding different phases.
